# Supplementary material
Source: publisher site journal article supplement (https://www.spandidos-publications.com/7311/downloadSupplementary)
Supplement: Supplementary file 1 [file downloadSupplementary]

**Table SI.** Quantitative PCR pre-assay was performed to determine the transfection (knockdown) efficiency of shSHP2 and the corresponding disrupted shRNA during isolation.

| <b>Control</b> | <b>shSHP2</b> |
|----------------|---------------|
| 0,96784        | 0,369293678   |
| 0,840609192    | 0,386759099   |
| 1,191550809    | 0,574152998   |

SHP2, Src homology-2 domain-containing protein tyrosine phosphatase; sh-, short hairpin.
